# Supplementary material for: A stochastic simulation model to study respondent-driven recruitment
Source: PubMed Central journal article supplement (PMC6237413; doi:10.1371/journal.pone.0207507), 2018-11-15
Supplement: pone.0207507.s005.pdf [file pone.0207507.s005.pdf]

**S1 Table. Mean number of successfully sent invitations, stratified by recruiter's characteristics, as observed in the data set.**

| Recruiter   |           |                   | Proportions that sent 0-4 invitations |      |      |      |      |           |       | Beta-binomial distribution |         |      |               |
|-------------|-----------|-------------------|---------------------------------------|------|------|------|------|-----------|-------|----------------------------|---------|------|---------------|
| Sex         | Age group | Educational level | 0                                     | 1    | 2    | 3    | 4    | $\bar{x}$ | $s^2$ | $\alpha$                   | $\beta$ | p    | $\bar{x} * p$ |
| F           | A1        | A                 | 0.55                                  | 0.08 | 0.03 | 0.05 | 0.29 | 1.45      | 3.24  | 0.09                       | 0.15    | 0.10 | 0.15          |
| F           | A1        | B                 | 0.54                                  | 0.06 | 0.04 | 0.03 | 0.34 | 1.58      | 3.45  | 0.07                       | 0.10    | 0.20 | 0.32          |
| F           | A2        | A                 | 0.57                                  | 0.05 | 0.03 | 0.03 | 0.32 | 1.48      | 3.39  | 0.06                       | 0.09    | 0.20 | 0.30          |
| F           | A2        | B                 | 0.52                                  | 0.03 | 0.06 | 0.04 | 0.35 | 1.67      | 3.48  | 0.07                       | 0.09    | 0.27 | 0.45          |
| F           | A3        | A                 | 0.59                                  | 0.05 | 0.03 | 0.02 | 0.32 | 1.42      | 3.38  | 0.04                       | 0.08    | 0.21 | 0.30          |
| F           | A3        | B                 | 0.52                                  | 0.07 | 0.03 | 0.01 | 0.37 | 1.64      | 3.55  | 0.06                       | 0.08    | 0.16 | 0.26          |
| M           | A1        | A                 | 0.79                                  | 0.07 | 0.00 | 0.00 | 0.14 | 0.64      | 2.02  | 0.03                       | 0.14    | 0.11 | 0.07          |
| M           | A1        | B                 | 0.57                                  | 0.09 | 0.02 | 0.00 | 0.32 | 1.41      | 3.36  | 0.06                       | 0.10    | 0.21 | 0.30          |
| M           | A2        | A                 | 0.65                                  | 0.03 | 0.00 | 0.00 | 0.32 | 1.30      | 3.48  | 0.01                       | 0.03    | 0.20 | 0.26          |
| M           | A2        | B                 | 0.59                                  | 0.05 | 0.02 | 0.04 | 0.30 | 1.41      | 3.34  | 0.05                       | 0.09    | 0.16 | 0.22          |
| M           | A3        | A                 | 0.66                                  | 0.05 | 0.02 | 0.02 | 0.25 | 1.14      | 3.00  | 0.04                       | 0.10    | 0.25 | 0.29          |
| M           | A3        | B                 | 0.65                                  | 0.07 | 0.04 | 0.01 | 0.24 | 1.13      | 2.88  | 0.05                       | 0.13    | 0.22 | 0.25          |
| mean values |           |                   |                                       |      |      |      |      | 1.36      | 3.21  |                            |         | 0.19 | 0.26          |
