# Supplementary material for: A stochastic simulation model to study respondent-driven recruitment
Source: PubMed Central journal article supplement (PMC6237413; doi:10.1371/journal.pone.0207507), 2018-11-15
Supplement: pone.0207507.s006.pdf [file pone.0207507.s006.pdf]

**S2 Table. Successful sending observed in the data set, stratified by seeds and recruitees, and by recruiter's characteristics.**

| seed /<br>recruitees | Recruiter |              |                      | Proportions that sent 0-4 invitations |      |      |      |      |           |       | Beta-binomial distribution |         |      |               |
|----------------------|-----------|--------------|----------------------|---------------------------------------|------|------|------|------|-----------|-------|----------------------------|---------|------|---------------|
|                      | Sex       | Age<br>group | Educational<br>level | 0                                     | 1    | 2    | 3    | 4    | $\bar{x}$ | $s^2$ | $\alpha$                   | $\beta$ | p    | $\bar{x} * p$ |
| seed                 | F         | A1           | A                    | 0.50                                  | 0.08 | 0.04 | 0.08 | 0.29 | 1.58      | 3.30  | 0.12                       | 0.19    | 0.13 | 0.21          |
| seed                 | F         | A1           | B                    | 0.60                                  | 0.06 | 0.04 | 0.03 | 0.27 | 1.31      | 3.15  | 0.06                       | 0.13    | 0.21 | 0.27          |
| seed                 | F         | A2           | A                    | 0.55                                  | 0.06 | 0.03 | 0.03 | 0.33 | 1.54      | 3.42  | 0.06                       | 0.10    | 0.20 | 0.31          |
| seed                 | F         | A2           | B                    | 0.58                                  | 0.03 | 0.05 | 0.04 | 0.30 | 1.46      | 3.34  | 0.06                       | 0.10    | 0.27 | 0.39          |
| seed                 | F         | A3           | A                    | 0.69                                  | 0.02 | 0.04 | 0.02 | 0.24 | 1.09      | 2.94  | 0.03                       | 0.08    | 0.25 | 0.27          |
| seed                 | F         | A3           | B                    | 0.51                                  | 0.08 | 0.03 | 0.01 | 0.37 | 1.65      | 3.54  | 0.06                       | 0.08    | 0.16 | 0.27          |
| seed                 | M         | A1           | A                    | 0.67                                  | 0.11 | 0.00 | 0.00 | 0.22 | 1.00      | 3.00  | 0.05                       | 0.14    | 0.00 | 0.00          |
| seed                 | M         | A1           | B                    | 0.58                                  | 0.08 | 0.04 | 0.00 | 0.29 | 1.33      | 3.28  | 0.06                       | 0.12    | 0.25 | 0.33          |
| seed                 | M         | A2           | A                    | 0.63                                  | 0.04 | 0.00 | 0.00 | 0.33 | 1.35      | 3.52  | 0.02                       | 0.04    | 0.18 | 0.24          |
| seed                 | M         | A2           | B                    | 0.60                                  | 0.04 | 0.01 | 0.04 | 0.31 | 1.42      | 3.40  | 0.05                       | 0.08    | 0.17 | 0.24          |
| seed                 | M         | A3           | A                    | 0.65                                  | 0.05 | 0.01 | 0.02 | 0.26 | 1.19      | 3.10  | 0.04                       | 0.09    | 0.24 | 0.28          |
| seed                 | M         | A3           | B                    | 0.67                                  | 0.06 | 0.03 | 0.01 | 0.23 | 1.07      | 2.84  | 0.04                       | 0.12    | 0.22 | 0.23          |
| recruitees           | F         | A1           | A                    | 0.58                                  | 0.08 | 0.03 | 0.03 | 0.29 | 1.37      | 3.27  | 0.07                       | 0.12    | 0.08 | 0.11          |
| recruitees           | F         | A1           | B                    | 0.43                                  | 0.07 | 0.02 | 0.02 | 0.45 | 2.00      | 3.72  | 0.07                       | 0.07    | 0.19 | 0.39          |
| recruitees           | F         | A2           | A                    | 0.63                                  | 0.04 | 0.02 | 0.04 | 0.29 | 1.32      | 3.31  | 0.04                       | 0.08    | 0.19 | 0.25          |
| recruitees           | F         | A2           | B                    | 0.32                                  | 0.05 | 0.09 | 0.02 | 0.53 | 2.39      | 3.35  | 0.13                       | 0.09    | 0.28 | 0.67          |
| recruitees           | F         | A3           | A                    | 0.37                                  | 0.11 | 0.00 | 0.02 | 0.50 | 2.17      | 3.66  | 0.09                       | 0.07    | 0.17 | 0.37          |
| recruitees           | F         | A3           | B                    | 0.56                                  | 0.03 | 0.03 | 0.03 | 0.36 | 1.61      | 3.67  | 0.04                       | 0.06    | 0.16 | 0.25          |
| recruitees           | M         | A1           | A                    | 0.84                                  | 0.05 | 0.00 | 0.00 | 0.11 | 0.47      | 1.60  | 0.02                       | 0.14    | 0.22 | 0.11          |
| recruitees           | M         | A1           | B                    | 0.55                                  | 0.10 | 0.00 | 0.00 | 0.35 | 1.50      | 3.63  | 0.05                       | 0.08    | 0.17 | 0.25          |
| recruitees           | M         | A2           | A                    | 0.70                                  | 0.00 | 0.00 | 0.00 | 0.30 | 1.20      | 3.54  | 0.00                       | 0.01    | 0.25 | 0.30          |
| recruitees           | M         | A2           | B                    | 0.58                                  | 0.08 | 0.03 | 0.03 | 0.30 | 1.40      | 3.32  | 0.06                       | 0.11    | 0.14 | 0.20          |
| recruitees           | M         | A3           | A                    | 0.70                                  | 0.05 | 0.05 | 0.00 | 0.20 | 0.95      | 2.68  | 0.04                       | 0.14    | 0.32 | 0.30          |
| recruitees           | M         | A3           | B                    | 0.57                                  | 0.11 | 0.05 | 0.00 | 0.27 | 1.30      | 3.05  | 0.09                       | 0.17    | 0.25 | 0.32          |
