# Supplementary material for: A stochastic simulation model to study respondent-driven recruitment
Source: PubMed Central journal article supplement (PMC6237413; doi:10.1371/journal.pone.0207507), 2018-11-15
Supplement: pone.0207507.s007.pdf [file pone.0207507.s007.pdf]

**S3 Table. Parameter values for scenarios S15 to S18.**

| seed /<br>recruitees | Recruiter |              |                      | Proportions that sent 0-4 invitations |      |      |      |      |                 |             | Beta-binomial<br>distribution |         | p    | $\bar{x} * p$ |
|----------------------|-----------|--------------|----------------------|---------------------------------------|------|------|------|------|-----------------|-------------|-------------------------------|---------|------|---------------|
|                      | Sex       | Age<br>group | Educational<br>level | 0                                     | 1    | 2    | 3    | 4    | $\bar{x} + 0.6$ | $s^2 - 0.6$ | $\alpha$                      | $\beta$ |      |               |
| seed                 | F         | A1           | A                    | 0.27                                  | 0.13 | 0.12 | 0.14 | 0.35 | 2.18            | 2.70        | 0.41                          | 0.34    | 1.00 | 2.18          |
| seed                 | F         | A1           | B                    | 0.30                                  | 0.15 | 0.13 | 0.15 | 0.26 | 1.91            | 2.55        | 0.45                          | 0.49    | 1.00 | 1.91          |
| seed                 | F         | A2           | A                    | 0.29                                  | 0.12 | 0.10 | 0.13 | 0.36 | 2.14            | 2.82        | 0.34                          | 0.30    | 1.00 | 2.14          |
| seed                 | F         | A2           | B                    | 0.30                                  | 0.13 | 0.12 | 0.13 | 0.32 | 2.06            | 2.74        | 0.37                          | 0.35    | 1.00 | 2.06          |
| seed                 | F         | A3           | A                    | 0.33                                  | 0.18 | 0.15 | 0.15 | 0.19 | 1.69            | 2.34        | 0.48                          | 0.66    | 1.00 | 1.69          |
| seed                 | F         | A3           | B                    | 0.29                                  | 0.10 | 0.09 | 0.11 | 0.41 | 2.25            | 2.94        | 0.28                          | 0.22    | 1.00 | 2.25          |
| seed                 | M         | A1           | A                    | 0.37                                  | 0.17 | 0.13 | 0.13 | 0.19 | 1.60            | 2.40        | 0.40                          | 0.60    | 1.00 | 1.60          |
| seed                 | M         | A1           | B                    | 0.32                                  | 0.14 | 0.12 | 0.14 | 0.28 | 1.93            | 2.68        | 0.38                          | 0.41    | 1.00 | 1.93          |
| seed                 | M         | A2           | A                    | 0.35                                  | 0.12 | 0.10 | 0.11 | 0.32 | 1.95            | 2.92        | 0.27                          | 0.29    | 1.00 | 1.95          |
| seed                 | M         | A2           | B                    | 0.31                                  | 0.13 | 0.11 | 0.13 | 0.32 | 2.02            | 2.80        | 0.34                          | 0.33    | 1.00 | 2.02          |
| seed                 | M         | A3           | A                    | 0.33                                  | 0.16 | 0.14 | 0.14 | 0.23 | 1.79            | 2.50        | 0.43                          | 0.53    | 1.00 | 1.79          |
| seed                 | M         | A3           | B                    | 0.32                                  | 0.19 | 0.16 | 0.15 | 0.18 | 1.67            | 2.24        | 0.55                          | 0.76    | 1.00 | 1.67          |
| recruitees           | F         | A1           | A                    | 0.31                                  | 0.14 | 0.12 | 0.14 | 0.29 | 1.97            | 2.67        | 0.39                          | 0.41    | 1.00 | 1.97          |
| recruitees           | F         | A1           | B                    | 0.27                                  | 0.05 | 0.04 | 0.06 | 0.57 | 2.60            | 3.12        | 0.15                          | 0.08    | 1.00 | 2.60          |
| recruitees           | F         | A2           | A                    | 0.32                                  | 0.14 | 0.12 | 0.13 | 0.29 | 1.92            | 2.71        | 0.36                          | 0.39    | 1.00 | 1.92          |
| recruitees           | F         | A2           | B                    | 0.21                                  | 0.03 | 0.02 | 0.03 | 0.71 | 2.99            | 2.75        | 0.10                          | 0.03    | 1.00 | 2.99          |
| recruitees           | F         | A3           | A                    | 0.26                                  | 0.04 | 0.03 | 0.04 | 0.64 | 2.77            | 3.06        | 0.11                          | 0.05    | 1.00 | 2.77          |
| recruitees           | F         | A3           | B                    | 0.31                                  | 0.09 | 0.08 | 0.10 | 0.42 | 2.21            | 3.07        | 0.23                          | 0.19    | 1.00 | 2.21          |
| recruitees           | M         | A1           | A                    | 0.34                                  | 0.35 | 0.21 | 0.08 | 0.02 | 1.07            | 1.00        | 2.69                          | 7.36    | 1.00 | 1.07          |
| recruitees           | M         | A1           | B                    | 0.33                                  | 0.10 | 0.09 | 0.10 | 0.38 | 2.10            | 3.03        | 0.25                          | 0.22    | 1.00 | 2.10          |
| recruitees           | M         | A2           | A                    | 0.39                                  | 0.11 | 0.09 | 0.11 | 0.30 | 1.80            | 2.94        | 0.24                          | 0.29    | 1.00 | 1.80          |
| recruitees           | M         | A2           | B                    | 0.31                                  | 0.13 | 0.12 | 0.13 | 0.31 | 2.00            | 2.72        | 0.37                          | 0.37    | 1.00 | 2.00          |
| recruitees           | M         | A3           | A                    | 0.34                                  | 0.20 | 0.17 | 0.15 | 0.14 | 1.55            | 2.08        | 0.59                          | 0.93    | 1.00 | 1.55          |
| recruitees           | M         | A3           | B                    | 0.29                                  | 0.16 | 0.15 | 0.16 | 0.24 | 1.90            | 2.45        | 0.50                          | 0.56    | 1.00 | 1.90          |
