# Supplementary material for: A stochastic simulation model to study respondent-driven recruitment
Source: PubMed Central journal article supplement (PMC6237413; doi:10.1371/journal.pone.0207507), 2018-11-15
Supplement: pone.0207507.s008.pdf [file pone.0207507.s008.pdf]

**S4 Table. Individuals with positive or negative beliefs as observed in Dutch sample.**

| Sex | Age group | Educational level | Positive vaccine belief | Negative vaccine belief |
|-----|-----------|-------------------|-------------------------|-------------------------|
| F   | A1        | A                 | 35.5%                   | 64.5%                   |
|     |           | B                 | 39.5%                   | 60.5%                   |
|     | A2        | A                 | 37.8%                   | 62.2%                   |
|     |           | B                 | 48.2%                   | 51.8%                   |
|     | A3        | A                 | 43.4%                   | 56.6%                   |
|     |           | B                 | 41.7%                   | 58.3%                   |
| M   | A1        | A                 | 46.4%                   | 53.6%                   |
|     |           | B                 | 56.8%                   | 43.2%                   |
|     | A2        | A                 | 45.4%                   | 54.6%                   |
|     |           | B                 | 42.9%                   | 57.1%                   |
|     | A3        | A                 | 59.4%                   | 40.6%                   |
|     |           | B                 | 63.9%                   | 36.1%                   |
