# Supplementary material for: A stochastic simulation model to study respondent-driven recruitment
Source: PubMed Central journal article supplement (PMC6237413; doi:10.1371/journal.pone.0207507), 2018-11-15
Supplement: pone.0207507.s009.pdf [file pone.0207507.s009.pdf]

**S5 Table. Output logistic regression for vaccine beliefs in Dutch sample.**

|              | estimate <sup>a</sup> | Std. Error | z value | Pr(> z ) |
|--------------|-----------------------|------------|---------|----------|
| Intercept    | -0.555                | 0.150      | -3.709  | 0.000    |
| Rec_age_A2   | 0.068                 | 0.152      | 0.448   | 0.654    |
| Rec_age_A3   | 0.319                 | 0.156      | 2.044   | 0.041    |
| Rec_gender_M | 0.434                 | 0.113      | 3.835   | 0.000    |
| Rec_edu_B    | 0.184                 | 0.108      | 1.702   | 0.089    |

<sup>a</sup>Null deviance: 2000.2 (df: 1447); residual variance: 1971.7 (df: 1443) and AIC: 1981.7.
