# Supplementary material for: A stochastic simulation model to study respondent-driven recruitment
Source: PubMed Central journal article supplement (PMC6237413; doi:10.1371/journal.pone.0207507), 2018-11-15
Supplement: pone.0207507.s010.pdf [file pone.0207507.s010.pdf]

**S6 Table. Estimated probability of an individual having a positive or negative vaccine belief.**

| <b>Sex</b> | <b>Age group</b> | <b>Educational level</b> | <b>Positive vaccine belief</b> | <b>Negative vaccine belief</b> |
|------------|------------------|--------------------------|--------------------------------|--------------------------------|
| F          | A1               | A                        | 0.36                           | 0.64                           |
| F          | A1               | B                        | 0.41                           | 0.59                           |
| F          | A2               | A                        | 0.38                           | 0.62                           |
| F          | A2               | B                        | 0.42                           | 0.58                           |
| F          | A3               | A                        | 0.44                           | 0.56                           |
| F          | A3               | B                        | 0.49                           | 0.51                           |
| M          | A1               | A                        | 0.47                           | 0.53                           |
| M          | A1               | B                        | 0.52                           | 0.48                           |
| M          | A2               | A                        | 0.49                           | 0.51                           |
| M          | A2               | B                        | 0.53                           | 0.47                           |
| M          | A3               | A                        | 0.55                           | 0.45                           |
| M          | A3               | B                        | 0.59                           | 0.41                           |
